# Supplementary material for: Breast density and estradiol are associated with distinct different expression patterns of metabolic proteins in normal human breast tissue in vivo
Source: Front Oncol. 2023 Mar 29;13:1128318. doi: 10.3389/fonc.2023.1128318 (PMC10090464; doi:10.3389/fonc.2023.1128318)
Supplement: Supplementary file 2 [file DataSheet_1.xlsx]

## Sheet: Blad1
	Adenosylhomocysteinase (AHCY)
	Adhesion G protein-coupled receptor E2 (ADGRE2)
	Adhesion G-protein coupled receptor G2 (ADGRG2)
	Amyloid-like protein 1 (APLP1)
	Angiopoietin-2 (ANGPT2)
	Angiopoietin-related protein 1 (ANGPTL1)
	Angiopoietin-related protein 7 (ANGPTL7)
	Annexin A11 (ANXA11)
	Annexin A4 (ANXA4)
	Appetite-regulating hormone (GHRL)
	Arginase-1 (ARG1)
	Aromatic-L-amino-acid decarboxylase (DDC)
	B-cell antigen receptor complex-associated protein beta chain (CD79B)
	Cadherin-2 (CDH2)
	Cadherin-related family member 5 (CDHR5)
	Calsyntenin-2 (CLSTN2)
	Carbonic anhydrase 13 (CA13)
	Catechol O-methyltransferase (COMT)
	Cathepsin O (CTSO)
	CD2-associated protein (CD2AP)
	Chordin-like protein 2 (CHRDL2)
	Clusterin-like protein 1 (CLUL1)
	Coiled-coil domain-containing protein 80 (CCDC80)
	Crk-like protein (CRKL)
	C-type lectin domain family 5 member A (CLEC5A)
	CXADR-like membrane protein (CLMP)
	Diablo homolog, mitochondrial (DIABLO)
	Dihydropteridine reductase (QDPR)
	Dipeptidyl peptidase 2 (DPP7)
	Disabled homolog 2 (DAB2)
	DNA-(apurinic or apyrimidinic site) lyase (APEX1)
	Ectonucleoside triphosphate diphosphohydrolase 5 (ENTPD5)
	Ectonucleotide pyrophosphatase/phosphodiesterase family member 7 (ENPP7)
	Eosinophil cationic protein (RNASE3)
	Fc receptor-like protein 1 (FCRL1)
	Fructose-1,6-bisphosphatase 1 (FBP1)
	Galanin peptides (GAL)
	Gamma-enolase (ENO2)
	Glutaredoxin-1 (GLRX)
	GRB2-related adapter protein 2 (GRAP2)
	Hepatoma-derived growth factor (HDGF)
	Inactive tyrosine-protein kinase transmembrane receptor ROR1 (ROR1)
	Insulin-like growth factor-binding protein-like 1 (IGFBPL1)
	Integrin beta-7 (ITGB7)
	Kallikrein-10 (KLK10)
	Kynurenine--oxoglutarate transaminase 1 (KYAT1)
	Large proline-rich protein BAG6 (BAG6)
	Leucine-rich repeats and immunoglobulin-like domains protein 1 (LRIG1)
	Leukocyte immunoglobulin-like receptor subfamily A member 5 (LILRA5)
	Low-density lipoprotein receptor-related protein 11 (LRP11)
	Lysophosphatidic acid phosphatase type 6 (ACP6)
	Meprin A subunit beta (MEP1B)
	Meteorin-like protein (METRNL)
	Multiple coagulation factor deficiency protein 2 (MCFD2)
	NAD kinase (NADK)
	Nectin-2 (NECTIN2)
	Neural proliferation differentiation and control protein 1 (NPDC1)
	Neuronal pentraxin receptor (NPTXR)
	Nodal modulator 1 (NOMO1)
	N-terminal prohormone of brain natriuretic peptide (NT-proBNP)
	Paired immunoglobulin-like type 2 receptor beta (PILRB)
	Peptidyl-prolyl cis-trans isomerase FKBP4 (FKBP4)
	Phosphoprotein associated with glycosphingolipid-enriched microdomains 1 (PAG1)
	Pro-cathepsin H (CTSH)
	Protein FAM3C (FAM3C)
	Protein phosphatase inhibitor 2 (PPP1R2)
	Protein S100-P (S100P)
	Regenerating islet-derived protein 4 (REG4)
	Reticulon-4 receptor (RTN4R)
	Retinal dehydrogenase 1 (ALDH1A1)
	Ribosyldihydronicotinamide dehydrogenase [quinone] (NQO2)
	Scavenger receptor cysteine-rich domain-containing group B protein (SSC4D)
	Sclerostin (SOST)
	Semaphorin-3F (SEMA3F)
	Serpin B6 (SERPINB6)
	Serpin B8 (SERPINB8)
	Sialic acid-binding Ig-like lectin 7 (SIGLEC7)
	Sialomucin core protein 24 (CD164)
	Soluble calcium-activated nucleotidase 1 (CANT1)
	Sulfatase-modifying factor 2 (SUMF2)
	Synaptosomal-associated protein 23 (SNAP23)
	Syndecan-4 (SDC4)
	T-cell surface glycoprotein CD1c (CD1C)
	Thimet oligopeptidase (THOP1)
	Thioredoxin domain-containing protein 5 (TXNDC5)
	Thymidine phosphorylase (TYMP)
	Thyrotropin subunit beta (TSHB)
	Trefoil factor 2 (TFF2)
	Tubulointerstitial nephritis antigen-like (TINAGL1)
	Tyrosine-protein kinase receptor TYRO3 (TYRO3)
	Ubiquitin carboxyl-terminal hydrolase 8 (USP8)
	Versican core protein (VCAN)
